# Supplementary material for: A Sebum-Mimetic Lipid Monolayer and Its Interaction with (Bio)Surfactants
Source: MDPI journal article supplement (doi:10.3390/colloids6020037), 2022-06-20
Supplement: s1 [file s1]

Archive with 1 entries (1 files):
- colloids-1763131-supplementary.pdf
