# Supplementary material for: A Sebum-Mimetic Lipid Monolayer and Its Interaction with (Bio)Surfactants
Source: MDPI journal article supplement (doi:10.3390/colloids6020037), 2022-06-20
Supplement: s1 [file s1 › colloids-1763131-supplementary.pdf]

# Supplementary Material

## A Sebum-Mimetic Lipid Monolayer and Its Interaction with (Bio)Surfactants

Ilona Jurek<sup>1</sup>, Kamil Wojciechowski<sup>1</sup> \*

*1) Faculty of Chemistry, Warsaw University of Technology, Noakowskiego 3, 00-664*

*Warsaw, Poland*

Table S1. Details of the origin and composition of lipids used for preparation of the synthetic sebum

| Component                | Origin                             | Content [%<br>mol/mol] | Average molar mass [g/mol] (literature source)                                                                                                                                                                        |
|--------------------------|------------------------------------|------------------------|-----------------------------------------------------------------------------------------------------------------------------------------------------------------------------------------------------------------------|
| Stearic acid<br>≥ 98,5%, | Sigma-Aldrich                      | 38                     | 282.5 (supplier's webpage)                                                                                                                                                                                            |
| Cholesterol<br>≥ 99%     | Sigma-Aldrich                      | 4                      | 386.7 (supplier's webpage)                                                                                                                                                                                            |
| Lanolin                  | Zarzeccy<br>Drogerie Sp. z<br>o.o. | 27                     | 370.0 (A. Sengupta, J. Behera, Comprehensive view on chemistry, manufacturing & applications of lanolin extracted from wool pretreatment, American Journal of Engineering Research (AJER). 3 (2014), issue 7, 33–43.] |
| Lard                     | FPH. „Agi”<br>S.Koncewicz          | 18                     | 846.8 (A. Yamsub, A. Kaewchada, A. Jaree, Pork lard conversion to biodiesel using a microchannel reactor, Korean Journal of Chemical Engineering 31 (2014) 2170–2176; J.M. Dias, C.A. Ferraz,                         |

|                               |                      |    |                                                                                                                                    |
|-------------------------------|----------------------|----|------------------------------------------------------------------------------------------------------------------------------------|
|                               |                      |    | M.F. Almeida, Using Mixtures of Waste Frying Oil and Pork Lard to produce Biodiesel, Engineering and Technology. 2 (2008) 258–262) |
| Squalane<br>from olive<br>oil | Neatwholesale,<br>UK | 13 | 422.8 (supplier's webpage)                                                                                                         |

Table S2. Details of the origin of the herbal material used in the study

| Common name    | Latin name                                     | Origin                                                                                                                          | Specimen voucher no. |
|----------------|------------------------------------------------|---------------------------------------------------------------------------------------------------------------------------------|----------------------|
| Oat            | <i>Avena sativa</i> L.                         | P.P.U.H. Niro Sp. z o.o., Boronów, Poland (mixture of hulless varieties from ecological agriculture). Purchase date: 2018       | WA0000098194         |
| Horse chestnut | <i>Aesculus hippocastanum</i> L.               | Astex Sp. z o.o., Wierzbówiec, Poland (collected from the wild state). Purchase date: 2019                                      | WA0000098193         |
| Cowherb        | <i>Vaccaria hispanica</i> [P. Mill.] Rauschert | Canadian Carnation BioProducts Company LLC, Canada. Purchase date: 2017                                                         | WA0000098198         |
| Soapwort       | <i>Saponaria officinalis</i> L.                | “Dary Natury”, Koryciny, Poland. Purchase date: 2017                                                                            | WA0000098197         |
| Soybean        | <i>Glycine max</i> (L.) Merr.                  | BRAT.pl Sp. z o.o., Rabka-Zdrój, Poland (mixture of unknown varieties). Purchase date: 2018                                     | WA0000098196         |
| Quinoa         | <i>Chenopodium quinoa</i> Willd.               | “Faro” variety, cultivated in Poland (Research Centre for Cultivar Testing in Chrzastowo) by dr hab. K. Gęsiński, University of | WA0000098195         |

|  |  |                                                                                                                  |  |
|--|--|------------------------------------------------------------------------------------------------------------------|--|
|  |  | Science and Technology<br>Bydgoszcz, Poland). The<br>seed hulls were obtained<br>by mechanical<br>scarification. |  |
|--|--|------------------------------------------------------------------------------------------------------------------|--|
